# Supplementary material for: Unprecedented preparation of pincer bis(oxazolinyl)phenyl ligands on solid support and their use in the first heterogeneously-catalyzed enantioselective allylation of aldehydesElectronic supplementary information (ESI) available: general procedures for the preparation of resins 1 and 2 and the catalysis and characterisation data of resins 1. See http://www.rsc.org/suppdata/cc/b3/b301308a/
Source: Royal Society of Chemistry journal article supplement (doi:10.1039/b301308a), 2003-01-01
Supplement: b301308a.doc [file b301308a.doc]

Unprecedented Preparation of Pincer Bis(oxazolinyl)phenyl Ligands on Solid Support and Their Use in the First Heterogeneously Catalyzed Enantioselective Allylation of Aldehydes

Avi Weissberg and Moshe Portnoy*

*Supplementary Information for the deposition with the ESI service*

This supplementary information includes: general procedures for the preparation of resins **1** and **2** and the catalysis and characterisation data of resins **1**.

**General procedure for the preparation of polymer-bound Phebox ligands (1).** The solution of 11-bromoundecan-1-ol (2eq) in CH2Cl2 was added dropwise to a suspension of Imidate Wang resin in cyclohexane. The mixture was stirred at room temprature for 5 minutes. Then, a catalytic amount of boron trifluoride etherate was added, and the suspension was stirred at room temprature for another 10 minutes. The resin was filtered and washed with CH2Cl2 , THF and CH2Cl2. The resin was dried under vacuum and then suspended in anhydrous DMF. In another flask, LiH ( 8 equiv) was added to the solution containing dimethyl 5-hydroxyisophthalate (10 equiv) in dry DMF. After 5 minutes of stirring the solution was cannulated to the resin suspension, a catalytic ammout of tetrabutylammonium iodide was added and the reaction mixture stirred for 36 h at 60 0C. The resin was filtered, washed with DMF, DMF:H2O, H2O, THF and CH2Cl2, dried under vacuum, and then suspended in anhydrous DMF. In another flask, LDA (20 equiv) was added dropwise to the solution of -amino alcohol (22 equiv) in dry DMF at 10 0C. This solution was mixed for 5 minutes, cannulated into the suspension in the first flask and stirred overnight at 60 0C. The resin was filtered, washed with DMF, DMF:H2O, H2O, THF and CH2Cl2, dried under vacuum, and then suspended in anhydrous THF for 10 min. In a second flask, PPh3 (10 equiv) and C2Cl6 (10 equiv) were dissolved in dry THF. This solution was cannulated to the resin suspension and the reaction mixture was stirred overnight at room temprature. The resin was filtered, washed with THF and CH2Cl2, dried under vacuum and then suspended in anhydrous THF to which DBU (100 equiv) was added. The reaction mixture was stirred for 48 h at 60 0C. The resin was filtered, washed with DMF, DMF:H2O, H2O, THF and CH2Cl2 and dried under vacuum.

**1a**: partial gel-phase 13C NMR (100MHz, C6H6): 162.5, 137.7, 116.8, 71.2, 69.3, 67.6, 41.2, 29.2, 25.6. Following acidolytic cleavage 1H NMR (200MHz, CDCl3/TFA 1:1):  8.30(s, 1H), 7.87(s, 2H), 7.20-7.37(m, 10H), 5.1-5.3(m, 4H), 5.05(m, 2H), 4.42(t, J = 6.6 Hz, 2H), 4.04(t, J = 6.2 Hz, 2H), 3.22(m, 4H), 1.80(m, 4H), 1.34(m, 14H).

**1b**: partial gel-phase 13C NMR (100MHz, C6H6):  161.8, 120.3, 116.6, 72.4, 69.7, 67.5, 32.2, 29.2, 25.5, 18.0. Following acidolytic cleavage 1H NMR (200MHz, CDCl3/TFA1:1):  8.44(s, 1H), 7.96(s, 2H), 5.28(t, J= 9.8 Hz, 2H), 5.00(m, 2H), 4.65(m, 2H), 4.41(t, J = 6.6 Hz, 2H), 4.05(t, J = 6.6 Hz, 2H), 2.15(m, 2H), 1.83(m, 4H), 1.33(m, 14H), 1.10(d, J = 6.8 Hz, 6H), 1.06(d, J = 6.8 Hz, 6H).

**1c**: partial gel-phase 13C NMR (100MHz, C6H6): 161.8, 120, 114, 73.3, 72.0, 69.5, 67.5, 61.7, 29.2, 25.7, 25.3, 20.7. Following acidolytic cleavage 1H-NMR (200MHz, CDCl3/TFA 1:1):  8.34 (s, 1H), 7.92 (s, 2H), 5.36 (t, J = 8.8 Hz, 2H) 4.86 (m, 4H), 4.41 (t, J = 6.6 Hz, 2H), 4.06 (t, J = 6.2 Hz, 2H), 1.79 (m, 4H), 1.64 (d, J = 5.8 Hz, 6H), 1.33(m, 14H).

**1d**: partial gel-phase 13C NMR (100MHz, C6H6): 161.8, 120.3, 116.5, 71.4, 69.4, 67.6, 29.2, 28.2, 25.5, 22.8, 9.6. Following acidolytic cleavage product 1 H NMR (200MHz, CDCl3/TFA):  8.39(s, 1H), 7.94(s, 2H), 5.34(t, J = 9.6 Hz, 2H), 4.93(t, J = 9.0 Hz, 2H), 4.77(m, 2H), 4.41(t, J = 6.6 Hz, 2H), 4.07(t, J = 6.4 Hz, 2H), 1.9(m, 8H), 1.31(m, 14H), 1.06(t, J = 7.2 Hz, 6H).

**General procedure for complexation of polymer-bound Phebox ligands**. Rhodium trichloride hydrate (1 equiv) was dissolved in a minimum amount of methanol. In another flask, the resin-bound Phebox ligand was suspended in DMF. The solution of the first flask was cannulated to the resin suspension, 5 equiv of diisopropylethylamine was added and the solution was heated to 70 0C for 24 hours. The resin was filtered, washed with DMF:H2O, H2O, MeOH, THF and CH2Cl2 and dried under vacuum. Loading of Rh complexes determined using ICP-AE is ca. 0.1 mmol/g.

**General pocedure for the catalysis**. An aldehyde (1 equiv) and tributylallyltin (1.5 equiv) was added to the suspension of **2** (0.03 eqiv) in dry CH2Cl2 (2.5 ml/100 mg resin). The mixture was stirred for 4 days at room temprature. Then the resin was filtered and washed twice with CH2Cl2. The crude obtained after evaporation of the solvent from the combined solution was separated on silicagel column to obtain the pure product. Ee was determined by HPLC using a Chiralcel OD column (hexanes:isopropanol 95:5).
